# Supplementary material
Source: publisher figshare collection journal article supplement (https://gsapubs.figshare.com/ndownloader/files/23300084)
Supplement: Supplementary file 1 [file 23300084]

## Sheet: Study locations
Table DR1
Member	Location	Abbr.	Latitude	Longitude
Douglas Creek	Wagon Road	WR	47.4645	-119.873
	Yakima Canyon	YC	46.7355	-120.451
Vantage	Central Ferry	CF	46.651	-117.807
	Dodge	D	46.5255	-117.805
	Edgemont 3	ED3	46.8822	-120.424
	Pleasant Valley	PV	45.8368	-120.528
	Umtanum 1	U1	46.9127	-120.506
	Vantage	V	46.9514	-119.992
	Windust	W	46.5516	-118.555
Squaw Creek	Goodnoe Hill	GH	45.757	-120.454
and Quincy	Hoctor Road	HR	45.7799	-120.502
	Old Vantage Highway	OVH	47.0295	-119.964
	Roosevelt 1	R1	45.7707	-120.182
	Scan Coffine Lake	SCL	47.1448	-119.925
	Silica Road	SR	47.0513	-119.967
	Trinidad	T	47.2401	-119.987
	Sulphur	S	46.6322	-118.639
Selah	Ayers Road	AR	46.0646	-118.957
	Burbank Creek	BC	46.7329	-120.385
	Chapman Creek	CC	45.768	-120.34
	Jericho	J	46.8228	-119.818
	Mattawa (lower part)	MA	46.7776	-119.913
	Plymouth Road	PRD 1	45.9984	-119.35
	Roosevelt 3	R3	45.7744	-120.173
Rattlesnake Ridge	Bert James Road	BJ	46.1999	-119.713
	Mabton	M	46.1411	-120.026
	Mabton-Bickleton Road	MB	46.1129	-120.055
	Mattawa (upper part)	MA	46.7776	-119.913
	Old Inland Empire	OIE	46.2742	-119.577
	Plymouth Road	PRD 2	45.9984	-119.35
	Prosser	P	46.2219	-119.692
	Sellars Road	SRD	46.1273	-119.845
	Toppenish Ridge	TR	46.282	-120.501
	Wallula Junction	WJ	46.0581	-118.92
	Webber Canyon	WC	46.1859	-119.457
Other	Palouse Falls	PF	46.666	-118.224
interbeds	Pleasant Valley	PV	45.8368	-120.528

## Sheet: Paly data (reduced)
Number	3	6	7	8	12	13	14	Number	19	23	32	33	34	35	36	Number	37	38	39	40	41	43	47	48	Number	49	50	51	58	59	60	61	62	Number	63	64	65	67	68	71	72	73	Number	79	80	81	82	83	84
Depth	33.44	54.01	57.23	62.52	78.57	79.37	103.07	Depth	171.72	199.29	284.42	287.31	289.88	293.15	296.21	Depth	295.89	298.86	299.06	299.1	299.14	301.62	304.35	304.45	Depth	304.62	304.67	306.79	334.31	350.57	350.72	352.95	253.1	Depth	353.17	353.19	353.35	355.63	355.73	369.25	369.55	371.98	Depth	393.39	394.29	396.99	397.59	403.31	404.41
Sample Code	BJ-1-14	M-1-5	M-1-3m	MB-1-10m	OIE-1-6	OIE-1-4	P-1-4	Sample Code	TR-3-2	AR-1-4b	HR-1-3	OVH-1-5	OVH-2-5	OVH-3-1	SCL-1-4b	Sample Code	SCL-1-2t	T-1-5	T-1-4	T-1-3	T-1-2	T-2-4	T-3-4	T-3-3	Sample Code	T-3-2	T-3-1	T-4-7	ED3-1-8	PF-1-3	PF-1-2	PF-2-5t	PF-2-4b	Sample Code	PF-2-3	PF-2-2	PF-2-1	PF-3-2b	PF-3-1	V-1-2t	V-1-1b	V-2-7t	Sample Code	WR-1-11b	WR-1-9	WR-1-4	WR-1-3	WR-2-6t	WR-2-3t
Angiosperms								Angiosperms								Angiosperms									Angiosperms									Angiosperms									Angiosperms
Alnipollenites verus	3	0	0	1	4	1	1	Alnipollenites verus	0	4	2	1	0	0	0	Alnipollenites verus	0	0	0	0	0	0	0	0	Alnipollenites verus	0	0	0	2	0	0	0	32	Alnipollenites verus	43	6	0	1	0	0	0	0	Alnipollenites verus	14	9	1	22	17	9
Carpinus-type	0	0	0	0	0	0	0	Carpinus-type	0	0	0	0	0	0	0	Carpinus-type	0	0	0	0	0	0	0	0	Carpinus-type	0	0	0	0	0	0	0	0	Carpinus-type	43	0	0	0	0	0	0	0	Carpinus-type	0	0	0	0	0	0
Caryapollenites simplex	1	0	0	5	0	0	0	Caryapollenites simplex	0	0	0	1	0	0	0	Caryapollenites simplex	0	2	0	0	0	0	0	0	Caryapollenites simplex	0	0	0	0	3	52	23	22	Caryapollenites simplex	133	28	95	33	32	0	0	0	Caryapollenites simplex	0	14	0	0	3	9
Chenopodium-type	0	0	0	0	2	1	0	Chenopodium-type	0	0	0	0	0	0	0	Chenopodium-type	0	4	0	0	0	0	1	0	Chenopodium-type	0	0	0	0	0	0	1	0	Chenopodium-type	0	0	0	0	0	0	0	0	Chenopodium-type	0	0	7	0	0	7
Corsinipollenites oculusnoctis	0	0	0	0	0	0	0	Corsinipollenites oculusnoctis	0	0	0	3	0	0	0	Corsinipollenites oculusnoctis	0	0	0	0	0	0	0	0	Corsinipollenites oculusnoctis	0	0	0	0	0	0	1	0	Corsinipollenites oculusnoctis	6	0	2	1	0	0	0	0	Corsinipollenites oculusnoctis	8	0	0	0	0	0
Cupuliferoidaepollenites liblarensis	0	0	0	0	0	0	0	Cupuliferoidaepollenites liblarensis	0	0	0	0	0	0	0	Cupuliferoidaepollenites liblarensis	0	0	0	0	0	0	0	0	Cupuliferoidaepollenites liblarensis	0	0	0	0	0	0	0	0	Cupuliferoidaepollenites liblarensis	0	0	13	0	0	0	0	0	Cupuliferoidaepollenites liblarensis	0	5	0	1	0	0
Cupuliferoidaepollenites sp.	0	0	0	0	1	1	0	Cupuliferoidaepollenites sp.	0	0	0	12	0	0	0	Cupuliferoidaepollenites sp.	0	0	0	0	0	0	0	0	Cupuliferoidaepollenites sp.	0	0	0	0	0	0	0	0	Cupuliferoidaepollenites sp.	0	0	0	0	0	0	0	4	Cupuliferoidaepollenites sp.	29	1	0	12	0	13
Cupuliferoipollenites cingulum	0	0	0	0	2	2	0	Cupuliferoipollenites cingulum	0	0	0	11	0	0	0	Cupuliferoipollenites cingulum	0	3	0	0	0	0	0	0	Cupuliferoipollenites cingulum	0	0	0	0	0	0	0	5	Cupuliferoipollenites cingulum	4	0	0	0	0	0	0	0	Cupuliferoipollenites cingulum	14	1	0	14	24	23
Cupuliferoipollenites spp.	0	0	0	0	0	0	1	Cupuliferoipollenites spp.	0	1	0	30	0	0	0	Cupuliferoipollenites spp.	0	0	0	0	0	0	0	0	Cupuliferoipollenites spp.	0	0	0	4	0	0	0	0	Cupuliferoipollenites spp.	0	9	0	0	0	0	0	0	Cupuliferoipollenites spp.	0	0	0	0	0	0
Ilexpollenites iliacus	1	0	0	0	0	0	0	Ilexpollenites iliacus	0	0	0	0	0	0	0	Ilexpollenites iliacus	0	0	0	0	0	0	0	0	Ilexpollenites iliacus	0	0	0	0	0	0	0	0	Ilexpollenites iliacus	0	0	0	0	0	0	0	0	Ilexpollenites iliacus	1	0	0	1	2	0
Intratriporopollenites spp.	0	0	0	0	0	0	0	Intratriporopollenites spp.	0	0	0	13	0	0	0	Intratriporopollenites spp.	0	0	0	0	0	0	0	0	Intratriporopollenites spp.	0	0	0	0	0	3	1	1	Intratriporopollenites spp.	3	2	3	10	0	0	0	0	Intratriporopollenites spp.	51	5	0	5	15	25
Juglanspollenites spp.	0	0	0	0	0	0	0	Juglanspollenites spp.	0	0	1	5	0	0	0	Juglanspollenites spp.	0	0	0	0	0	0	0	0	Juglanspollenites spp.	0	0	0	0	0	0	1	12	Juglanspollenites spp.	20	8	1	1	0	0	0	0	Juglanspollenites spp.	0	10	0	1	2	6
Liquidambarpollenites spp.	0	0	0	0	0	0	3	Liquidambarpollenites spp.	0	11	0	0	0	0	0	Liquidambarpollenites spp.	1	0	0	0	0	0	0	0	Liquidambarpollenites spp.	0	0	0	0	0	0	0	0	Liquidambarpollenites spp.	0	0	0	0	0	0	0	0	Liquidambarpollenites spp.	1	3	0	0	0	0
Momipites spp.	0	0	0	0	0	0	0	Momipites spp.	0	0	0	0	0	0	0	Momipites spp.	0	0	0	0	0	0	0	0	Momipites spp.	0	0	0	0	0	0	0	0	Momipites spp.	2	0	0	14	9	0	0	0	Momipites spp.	13	0	0	0	0	0
Nyssapollenites satzveyensis	0	0	0	0	0	0	0	Nyssapollenites satzveyensis	0	0	0	0	0	0	0	Nyssapollenites satzveyensis	0	0	0	0	0	0	0	0	Nyssapollenites satzveyensis	0	0	0	0	0	0	0	0	Nyssapollenites satzveyensis	0	0	0	0	0	0	0	0	Nyssapollenites satzveyensis	0	0	0	22	0	0
Nyssapollenites spp.	16	0	0	2	16	0	2	Nyssapollenites spp.	0	5	0	26	2	0	0	Nyssapollenites spp.	0	59	6	0	0	1	10	0	Nyssapollenites spp.	3	0	3	0	5	0	0	0	Nyssapollenites spp.	18	0	1	0	0	0	0	0	Nyssapollenites spp.	2	30	0	7	12	1
Platycaryapollenites platycaryoides	0	0	0	0	0	0	0	Platycaryapollenites platycaryoides	0	0	0	0	0	0	0	Platycaryapollenites platycaryoides	0	0	0	0	0	0	0	0	Platycaryapollenites platycaryoides	0	0	0	0	0	14	4	2	Platycaryapollenites platycaryoides	48	20	2	6	8	0	0	0	Platycaryapollenites platycaryoides	0	14	0	2	6	0
Poaceae-type	0	0	0	0	0	0	0	Poaceae-type	0	0	0	3	0	0	0	Poaceae-type	0	0	0	0	0	0	0	0	Poaceae-type	0	0	0	0	0	0	0	0	Poaceae-type	0	0	0	0	0	0	0	0	Poaceae-type	0	7	0	1	0	0
Pterocaryapollenitesspp.	0	0	0	0	0	0	0	Pterocaryapollenitesspp.	0	0	0	3	0	0	0	Pterocaryapollenitesspp.	0	0	0	0	0	0	0	0	Pterocaryapollenitesspp.	0	0	0	0	1	0	0	10	Pterocaryapollenitesspp.	30	0	0	0	0	0	0	0	Pterocaryapollenitesspp.	1	2	0	2	0	11
Quercoidites microhenrici	0	0	0	0	0	0	0	Quercoidites microhenrici	0	0	1	3	0	0	0	Quercoidites microhenrici	0	0	0	0	0	0	0	0	Quercoidites microhenrici	0	0	0	0	0	0	0	0	Quercoidites microhenrici	9	0	0	0	0	0	0	0	Quercoidites microhenrici	68	26	0	0	21	18
Rhoipites viburnoides	0	0	0	0	3	0	0	Rhoipites viburnoides	0	0	0	0	0	0	0	Rhoipites viburnoides	0	0	0	0	0	0	0	0	Rhoipites viburnoides	0	0	0	0	0	0	0	0	Rhoipites viburnoides	20	7	21	15	0	0	0	0	Rhoipites viburnoides	0	0	0	1	6	0
Salixpollenites sp.	0	0	0	0	0	0	6	Salixpollenites sp.	0	0	0	0	0	0	0	Salixpollenites sp.	0	0	0	0	0	0	0	0	Salixpollenites sp.	0	0	0	0	0	0	0	0	Salixpollenites sp.	0	0	0	0	0	0	0	0	Salixpollenites sp.	0	17	0	1	0	0
Salixpollenites discolorpites	0	0	0	0	0	0	0	Salixpollenites discolorpites	0	0	0	0	0	0	0	Salixpollenites discolorpites	0	0	0	0	0	0	0	0	Salixpollenites discolorpites	0	0	0	0	0	0	0	0	Salixpollenites discolorpites	0	0	0	0	0	0	0	0	Salixpollenites discolorpites	0	0	0	26	0	0
Scabratricolpites spp.	0	0	0	0	0	0	0	Scabratricolpites spp.	0	0	0	22	0	0	0	Scabratricolpites spp.	0	0	0	0	0	0	0	0	Scabratricolpites spp.	0	0	0	0	0	0	0	0	Scabratricolpites spp.	2	0	0	0	0	0	0	0	Scabratricolpites spp.	0	0	0	0	0	0
Triporopollenites coryloides	0	0	0	0	0	0	0	Triporopollenites coryloides	0	0	0	0	0	0	0	Triporopollenites coryloides	0	0	0	0	0	0	0	0	Triporopollenites coryloides	0	0	0	0	0	0	24	4	Triporopollenites coryloides	0	0	0	0	0	0	0	0	Triporopollenites coryloides	0	8	0	12	0	0
Trivestibulopollenites paleobetuloides	4	0	0	0	0	0	1	Trivestibulopollenites paleobetuloides	0	0	0	1	0	0	0	Trivestibulopollenites paleobetuloides	1	2	0	0	0	0	0	0	Trivestibulopollenites paleobetuloides	0	0	0	0	0	0	0	4	Trivestibulopollenites paleobetuloides	5	0	0	0	0	0	0	0	Trivestibulopollenites paleobetuloides	4	1	0	3	9	13
Ulmipollenites spp.	0	0	0	0	0	0	0	Ulmipollenites spp.	0	0	0	21	0	0	0	Ulmipollenites spp.	0	0	0	0	0	0	0	0	Ulmipollenites spp.	0	0	0	0	0	0	0	13	Ulmipollenites spp.	0	3	0	0	0	0	0	0	Ulmipollenites spp.	1	27	0	2	11	6
Gymnosperms								Gymnosperms								Gymnosperms									Gymnosperms									Gymnosperms									Gymnosperms
Cycadopites spp.	0	0	0	0	3	0	0	Cycadopites spp.	0	0	2	0	0	0	0	Cycadopites spp.	0	3	0	0	0	0	0	0	Cycadopites spp.	0	0	0	0	0	0	9	3	Cycadopites spp.	7	5	0	0	0	0	0	0	Cycadopites spp.	0	0	0	0	0	0
Cupressicates sp.	1	0	0	0	0	0	0	Cupressicates sp.	0	0	0	38	0	0	0	Cupressicates sp.	0	0	0	0	0	0	0	0	Cupressicates sp.	0	0	0	0	0	4	3	0	Cupressicates sp.	1	0	11	4	1	0	0	0	Cupressicates sp.	0	0	0	0	17	19
Polypodiopsida (ferns)								Polypodiopsida (ferns)								Polypodiopsida (ferns)									Polypodiopsida (ferns)									Polypodiopsida (ferns)									Polypodiopsida (ferns)
Baculatisporites primarius	0	0	0	0	0	41	0	Baculatisporites primarius	1	0	0	0	8	0	0	Baculatisporites primarius	0	0	0	0	0	0	0	0	Baculatisporites primarius	0	0	0	0	0	0	0	0	Baculatisporites primarius	0	0	0	0	0	0	0	0	Baculatisporites primarius	0	4	0	0	3	1
Deltoidospora spp.	0	0	0	0	0	3	0	Deltoidospora spp.	0	3	0	5	1	0	0	Deltoidospora spp.	0	51	0	3	0	2	2	0	Deltoidospora spp.	5	0	0	0	1	26	29	3	Deltoidospora spp.	23	11	48	2	10	0	6	0	Deltoidospora spp.	4	2	0	5	9	4
Laevigatosporites haardtii	1	0	0	7	0	0	0	Laevigatosporites haardtii	0	0	0	0	0	0	0	Laevigatosporites haardtii	0	0	0	0	0	0	0	0	Laevigatosporites haardtii	0	0	0	0	0	0	0	0	Laevigatosporites haardtii	2	0	0	0	0	0	0	0	Laevigatosporites haardtii	30	23	0	5	0	0
Laevigatosporites sp.	0	0	0	0	0	0	0	Laevigatosporites sp.	0	0	0	0	0	0	0	Laevigatosporites sp.	0	0	0	0	0	0	0	0	Laevigatosporites sp.	7	0	0	0	0	0	0	0	Laevigatosporites sp.	0	0	0	0	0	0	0	0	Laevigatosporites sp.	2	8	0	13	0	26
Microfoveolatosporites spp.	0	0	0	0	0	0	0	Microfoveolatosporites spp.	0	0	0	0	0	0	0	Microfoveolatosporites spp.	0	0	0	0	0	0	0	0	Microfoveolatosporites spp.	0	0	0	0	0	0	0	13	Microfoveolatosporites spp.	6	0	0	0	0	0	0	0	Microfoveolatosporites spp.	0	0	0	0	0	0
Verucatosporites favus	0	0	0	0	1	0	0	Verucatosporites favus	0	1	0	2	1	0	0	Verucatosporites favus	0	0	1	1	0	0	0	0	Verucatosporites favus	2	0	0	0	0	6	0	15	Verucatosporites favus	6	0	4	0	0	6	0	0	Verucatosporites favus	0	0	0	1	0	2
Lycopodiophyta (fern allies)								Lycopodiophyta (fern allies)								Lycopodiophyta (fern allies)									Lycopodiophyta (fern allies)									Lycopodiophyta (fern allies)									Lycopodiophyta (fern allies)
Echinosporis spp.	0	0	0	0	0	0	0	Echinosporis spp.	0	14	1	1	1	0	0	Echinosporis spp.	1	72	0	10	0	0	0	0	Echinosporis spp.	16	0	0	0	0	2	0	1	Echinosporis spp.	26	0	6	0	8	0	0	0	Echinosporis spp.	1	2	0	1	3	2
Lycopodiumsporites spp.	0	0	0	0	2	0	0	Lycopodiumsporites spp.	0	49	1	5	3	0	4	Lycopodiumsporites spp.	0	84	0	0	0	9	0	3	Lycopodiumsporites spp.	0	0	0	1	0	31	1	0	Lycopodiumsporites spp.	3	19	3	5	1	21	0	0	Lycopodiumsporites spp.	6	0	2	2	1	2
Bryophyta (mosses)								Bryophyta (mosses)								Bryophyta (mosses)									Bryophyta (mosses)									Bryophyta (mosses)									Bryophyta (mosses)
Stereisporites spp.	0	0	0	4	1	1	0	Stereisporites spp.	0	17	0	16	0	0	0	Stereisporites spp.	0	38	0	13	0	0	0	0	Stereisporites spp.	6	0	0	0	0	32	0	1	Stereisporites spp.	56	18	26	32	29	0	0	47	Stereisporites spp.	0	6	0	11	2	11
Trilete type 1	0	1	0	0	0	0	0	Trilete type 1	0	4	0	0	2	0	0	Trilete type 1	0	0	1	0	0	0	0	0	Trilete type 1	0	0	0	0	0	1	3	0	Trilete type 1	1	0	7	0	0	0	0	0	Trilete type 1	3	0	0	0	0	3
Chlorophyceae (green algae)								Chlorophyceae (green algae)								Chlorophyceae (green algae)									Chlorophyceae (green algae)									Chlorophyceae (green algae)									Chlorophyceae (green algae)
Botryococcus braunii	2	10	48	0	1	11	6	Botryococcus braunii	9	17	7	0	17	5	2	Botryococcus braunii	1	26	0	12	1	19	9	9	Botryococcus braunii	5	4	1	1	0	0	2	0	Botryococcus braunii	7	0	5	0	1	14	0	0	Botryococcus braunii	4	0	0	0	1	2
Schizosporis parvus	0	0	0	0	1	6	0	Schizosporis parvus	0	1	0	0	0	13	2	Schizosporis parvus	16	0	0	4	0	0	0	0	Schizosporis parvus	0	0	0	15	0	72	64	2	Schizosporis parvus	58	0	109	7	12	8	0	0	Schizosporis parvus	5	1	0	8	3	0
Pediastrum bifidites	0	0	0	0	0	0	0	Pediastrum bifidites	0	0	0	0	0	0	0	Pediastrum bifidites	0	0	0	0	0	0	0	0	Pediastrum bifidites	0	0	0	0	0	0	0	0	Pediastrum bifidites	11	0	0	0	0	0	0	0	Pediastrum bifidites	0	0	0	0	0	0
Chlorophyceae undiff.	0	0	0	0	0	30	0	Chlorophyceae undiff.	0	0	3	7	0	0	0	Chlorophyceae undiff.	1	22	0	39	0	1	1	0	Chlorophyceae undiff.	24	0	0	0	1	29	47	7	Chlorophyceae undiff.	0	14	106	0	0	0	0	0	Chlorophyceae undiff.	0	0	0	2	0	0
Fungi								Fungi								Fungi									Fungi									Fungi									Fungi
Fungal fruiting body	0	0	2	0	2	2	0	Fungal fruiting body	42	45	26	0	0	37	70	Fungal fruiting body	71	436	11	179	7	5	15	1	Fungal fruiting body	0	4	4	37	0	0	0	0	Fungal fruiting body	0	0	8	0	0	0	0	0	Fungal fruiting body	9	0	0	1	8	21
Fungal hyphea	0	2	9	20	0	2	0	Fungal hyphea	76	65	70	0	80	70	26	Fungal hyphea	119	26	45	58	18	18	14	19	Fungal hyphea	17	26	50	56	15	0	0	0	Fungal hyphea	0	0	13	0	0	13	18	0	Fungal hyphea	0	0	28	0	0	0
Fungal spore	0	14	0	1	96	59	1	Fungal spore	1	30	8	0	8	0	59	Fungal spore	0	96	0	100	0	3	0	0	Fungal spore	319	7	0	0	0	0	0	0	Fungal spore	0	0	1	0	0	30	49	0	Fungal spore	5	0	0	0	7	0
[truncated: 3 more columns]

## Sheet: Conifer record (complete)
Sample Code	BC-1-10	BC-1-5	BJ-1-14	BJ-1-4t	M-1-9b	M-1-5
Abiespollenites spp.	0	0	0	0	0	0
Cathaya-type	0	0	0	0	0	0
Cedripites spp.	0	0	0	0	0	0
Cycadopites spp.	0	0	0	0	0	0
Monocolpopollenites tranquilus	0	0	0	0	0	0
Piceapollenites spp.	0	0	0	0	0	0
Pinus diplox	0	0	0	0	0	0
Pinus haplox	0	0	0	0	0	0
Pinuspollenites spp.	0	0	2	0	0	0
Podocarpidites spp.	0	0	0	0	0	0
Pseudotsugapollenites spp.	0	0	0	0	0	0
Sciadopityspollenites serratus	0	0	0	0	0	0
Sequoiapollenites sp.	0	0	0	0	0	0
Tsugapollenites spp.	0	0	0	0	0	0
	M-1-3m	MB-1-10m	MB-1-9b	OIE-1-6	OIE-1-4	P-1-4
Abiespollenites spp.	0	0	0	0	0	0
Cathaya-type	0	0	0	0	0	0
Cedripites spp.	0	0	0	0	0	0
Cycadopites spp.	0	0	0	3	0	0
Monocolpopollenites tranquilus	0	0	0	0	0	0
Piceapollenites spp.	0	0	0	0	0	0
Pinus diplox	0	0	0	0	0	0
Pinus haplox	0	0	0	0	0	0
Pinuspollenites spp.	0	3	0	21	0	1
Podocarpidites spp.	0	0	0	2	0	0
Pseudotsugapollenites spp.	0	0	0	0	0	0
Sciadopityspollenites serratus	0	0	0	0	0	0
Sequoiapollenites sp.	0	0	0	0	0	0
Tsugapollenites spp.	0	0	0	0	0	0
	RL-1-7	RL-1-4b	SRD-1-1t	TR-3-2	TR-2-1	WC-1-2
Abiespollenites spp.	0	0	0	0	0	0
Cathaya-type	0	0	0	0	0	0
Cedripites spp.	0	0	0	0	0	0
Cycadopites spp.	0	0	0	0	0	0
Monocolpopollenites tranquilus	0	0	0	0	0	0
Piceapollenites spp.	0	0	0	0	0	0
Pinus diplox	0	0	0	0	0	0
Pinus haplox	0	0	0	0	0	0
Pinuspollenites spp.	3	0	0	0	0	1
Podocarpidites spp.	0	0	0	0	0	0
Pseudotsugapollenites spp.	0	0	0	0	0	0
Sciadopityspollenites serratus	0	0	0	0	0	0
Sequoiapollenites sp.	0	0	0	0	0	0
Tsugapollenites spp.	0	0	0	0	0	1
	WJ-1-3	AR-1-4b	CC-1-2	J-1-5b	PRD-1-2a	PRD-2-3m
Abiespollenites spp.	0	0	0	0	0	0
Cathaya-type	0	0	0	0	0	0
Cedripites spp.	0	0	0	0	0	0
Cycadopites spp.	0	0	0	0	0	0
Monocolpopollenites tranquilus	0	0	0	0	0	0
Piceapollenites spp.	0	0	0	0	0	0
Pinus diplox	0	0	0	0	0	0
Pinus haplox	0	0	0	0	0	0
Pinuspollenites spp.	0	5	0	0	0	0
Podocarpidites spp.	0	0	0	0	0	0
Pseudotsugapollenites spp.	0	0	0	0	0	0
Sciadopityspollenites serratus	0	0	0	0	0	0
Sequoiapollenites sp.	0	0	0	0	0	0
Tsugapollenites spp.	0	0	0	0	0	0
	PRD-2-2b	R3-3-20	R3-3-15	HR-1-5	HR-1-3	OVH-1-5
Abiespollenites spp.	0	0	0	0	0	3
Cathaya-type	0	0	0	0	0	0
Cedripites spp.	0	0	0	0	0	0
Cycadopites spp.	0	0	0	0	2	0
Monocolpopollenites tranquilus	0	0	0	0	0	0
Piceapollenites spp.	0	0	0	0	0	1
Pinus diplox	0	0	0	0	0	0
Pinus haplox	0	0	0	0	0	0
Pinuspollenites spp.	0	0	1	0	0	5
Podocarpidites spp.	0	0	0	0	0	0
Pseudotsugapollenites spp.	0	0	0	0	0	0
Sciadopityspollenites serratus	0	0	0	0	0	0
Sequoiapollenites sp.	0	0	0	0	0	0
Tsugapollenites spp.	0	0	0	0	0	0
	OVH-2-5	OVH-3-1	SCL-1-4b	SCL-1-2t	T-1-5	T-1-4
Abiespollenites spp.	0	0	0	0	0	0
Cathaya-type	0	0	0	0	0	0
Cedripites spp.	0	0	0	0	0	0
Cycadopites spp.	0	0	0	0	3	0
Monocolpopollenites tranquilus	0	0	0	0	0	0
Piceapollenites spp.	0	0	0	0	7	0
Pinus diplox	0	0	0	0	0	0
Pinus haplox	0	0	0	0	0	0
Pinuspollenites spp.	0	0	0	0	13	1
Podocarpidites spp.	0	0	0	0	0	0
Pseudotsugapollenites spp.	0	0	0	0	0	0
Sciadopityspollenites serratus	0	0	0	0	0	0
Sequoiapollenites sp.	0	0	0	0	0	0
Tsugapollenites spp.	0	0	0	0	0	0
	T-1-3	T-1-2	T-2-5	T-2-4	T-2-3	T-2-2
Abiespollenites spp.	0	0	0	0	0	0
Cathaya-type	0	0	0	0	0	0
Cedripites spp.	0	0	0	0	0	0
Cycadopites spp.	0	0	0	0	0	0
Monocolpopollenites tranquilus	0	0	0	0	0	0
Piceapollenites spp.	0	0	0	0	0	0
Pinus diplox	0	0	0	0	0	0
Pinus haplox	0	0	0	0	0	0
Pinuspollenites spp.	1	0	1	5	0	0
Podocarpidites spp.	0	0	0	0	0	0
Pseudotsugapollenites spp.	0	0	0	0	0	0
Sciadopityspollenites serratus	0	0	0	0	0	0
Sequoiapollenites sp.	0	0	0	0	0	0
Tsugapollenites spp.	0	0	0	0	0	0
	T-2-1	T-3-4	T-3-3	T-3-2	T-3-1	T-4-7
Abiespollenites spp.	0	0	0	0	0	0
Cathaya-type	0	0	0	0	0	0
Cedripites spp.	0	0	0	0	0	0
Cycadopites spp.	0	0	0	0	0	0
Monocolpopollenites tranquilus	0	0	0	0	0	0
Piceapollenites spp.	0	0	0	0	1	0
Pinus diplox	0	0	0	0	0	0
Pinus haplox	0	0	0	0	0	0
Pinuspollenites spp.	3	3	0	3	0	0
Podocarpidites spp.	0	0	0	1	0	0
Pseudotsugapollenites spp.	0	0	0	0	0	0
Sciadopityspollenites serratus	0	0	0	0	0	0
Sequoiapollenites sp.	0	0	0	0	0	0
Tsugapollenites spp.	0	0	0	0	0	0
	T-4-5t	T-4-4b	T-4-3	T-4-2	D-1-1b	ED3-1-11
Abiespollenites spp.	0	0	0	0	0	0
Cathaya-type	0	0	0	0	0	0
Cedripites spp.	0	0	0	0	0	0
Cycadopites spp.	0	0	0	0	0	0
Monocolpopollenites tranquilus	0	0	0	0	0	0
Piceapollenites spp.	0	0	0	0	0	0
Pinus diplox	0	0	0	0	0	0
Pinus haplox	0	2	0	0	0	0
Pinuspollenites spp.	0	0	0	0	1	0
Podocarpidites spp.	0	0	0	0	0	0
Pseudotsugapollenites spp.	0	0	0	0	0	0
Sciadopityspollenites serratus	0	0	0	0	0	0
Sequoiapollenites sp.	0	0	0	0	0	0
Tsugapollenites spp.	0	0	0	0	0	0
	ED3-1-8	PF-1-3	PF-1-2	PF-2-5t	PF-2-4b	PF-2-3
Abiespollenites spp.	0	0	0	0	0	0
Cathaya-type	0	0	0	0	0	2
Cedripites spp.	0	0	0	0	0	0
Cycadopites spp.	0	0	0	9	3	7
Monocolpopollenites tranquilus	0	0	0	0	0	0
Piceapollenites spp.	0	0	0	0	0	2
Pinus diplox	0	0	0	0	0	0
Pinus haplox	0	0	2	1	0	0
Pinuspollenites spp.	0	0	3	2	6	25
Podocarpidites spp.	0	0	0	0	0	0
Pseudotsugapollenites spp.	0	0	0	0	0	0
Sciadopityspollenites serratus	0	0	9	0	0	0
Sequoiapollenites sp.	0	0	0	0	0	0
Tsugapollenites spp.	0	0	0	0	0	0
	PF-2-2	PF-2-1	PF-3-3t	PF-3-2b	PF-3-1	PV-1-13
Abiespollenites spp.	0	0	0	0	0	0
Cathaya-type	0	0	0	0	0	0
Cedripites spp.	0	0	0	0	0	0
Cycadopites spp.	5	0	0	0	0	0
Monocolpopollenites tranquilus	0	0	0	0	0	0
Piceapollenites spp.	17	1	0	0	0	0
Pinus diplox	0	0	0	0	0	0
Pinus haplox	0	0	0	0	0	0
Pinuspollenites spp.	0	0	0	0	0	0
Podocarpidites spp.	0	0	0	0	0	0
Pseudotsugapollenites spp.	0	0	0	0	0	0
Sciadopityspollenites serratus	0	0	0	0	0	0
Sequoiapollenites sp.	0	0	0	0	0	0
Tsugapollenites spp.	0	0	0	2	0	0
	PV-1-12	V-1-2t	V-1-1b	V-2-7t	V-2-6m	W-1-3
Abiespollenites spp.	0	0	0	0	0	0
Cathaya-type	0	0	0	0	0	0
Cedripites spp.	0	0	0	0	0	0
Cycadopites spp.	0	0	0	0	0	0
Monocolpopollenites tranquilus	0	0	0	0	0	0
Piceapollenites spp.	0	0	0	0	0	0
Pinus diplox	0	0	0	0	0	0
Pinus haplox	0	0	0	0	0	0
Pinuspollenites spp.	0	0	0	0	0	0
Podocarpidites spp.	0	0	0	0	0	0
Pseudotsugapollenites spp.	0	0	0	0	0	0
Sciadopityspollenites serratus	0	0	0	0	0	0
Sequoiapollenites sp.	0	0	0	0	0	0
Tsugapollenites spp.	0	0	0	0	0	0
	W-2-1	W-3-1	W-4-1	WR-1-11b	WR-1-9	WR-1-4
Abiespollenites spp.	0	0	0	0	1	0
Cathaya-type	0	0	0	0	0	0
Cedripites spp.	0	0	0	0	0	0
Cycadopites spp.	0	0	0	0	0	0
Monocolpopollenites tranquilus	0	0	0	0	0	0
Piceapollenites spp.	0	0	0	0	20	0
Pinus diplox	0	0	0	0	0	0
Pinus haplox	0	0	0	0	0	0
Pinuspollenites spp.	0	0	0	3	9	0
Podocarpidites spp.	0	0	0	0	1	0
Pseudotsugapollenites spp.	0	0	0	0	0	0
Sciadopityspollenites serratus	0	0	0	0	0	0
Sequoiapollenites sp.	0	0	0	5	0	0
Tsugapollenites spp.	0	0	0	0	0	0
	WR-1-3	WR-2-6t	WR-2-3t	WR-3-11t	WR-3-3t	YC-1-7b
Abiespollenites spp.	0	0	0	1	1	0
Cathaya-type	0	0	0	0	0	0
Cedripites spp.	4	0	0	0	0	0
Cycadopites spp.	0	0	0	0	0	0
Monocolpopollenites tranquilus	6	0	0	0	0	0
Piceapollenites spp.	6	0	0	10	9	0
Pinus diplox	0	0	0	0	1	0
Pinus haplox	0	4	2	0	0	0
Pinuspollenites spp.	27	20	0	9	20	0
Podocarpidites spp.	0	0	0	0	1	0
Pseudotsugapollenites spp.	0	0	0	0	3	0
Sciadopityspollenites serratus	1	0	0	0	0	0
Sequoiapollenites sp.	0	0	0	0	1	0
Tsugapollenites spp.	1	0	0	0	0	0

## Sheet: Methods DCA
Detrended correspondence analysis (DCA) was performed with a tolerance of the eigenanalysis set at 1 x 10-7. Rare species were downweighted by using the Hill logarithm and data were square root transformed. DCA produced a scatter plot that shows the spatial distribution of the palynological taxa along two axes (environmental gradients). The scatter plot produced here includes 47 variables (= taxa…

## Sheet: DCA axes and communities
			Data in percentage
Sample ID	Axis 1	Axis 2	BF	SLS	NS	C	QCT
BJ-1-14	2.474	0	6.89655	0	86.2069	3.44828	3.44828
M-1-5	0.68	0.732	100	0	0	0	0
M-1-3m	0.346	0.796	100	0	0	0	0
MB-1-10m	1.673	1.293	52.5	10	25	12.5	0
OIE-1-6	1.635	1.012	73.3333	5.92593	17.7778	2.22222	0.740741
OIE-1-4	1.415	0.93	46.25	50.625	2.5	0	0.625
P-1-4	1.678	0.465	33.3333	0	66.6667	0	0
TR-3-2	0.177	1.126	99.2248	0.775194	0	0	0
AR-1-4b	1.121	1.429	59.6958	32.3194	7.98479	0	0
HR-1-3	0.833	1.255	90.9836	5.7377	1.63934	0	1.63934
OVH-1-5	2.824	1.04	0	15.7205	41.048	0.436681	42.7948
OVH-2-5	0.677	0.992	86.7769	11.5702	1.65289	0	0
OVH-3-1	0.335	1.439	89.6	10.4	0	0	0
SCL-1-4b	0.575	1.291	96.319	3.68098	0	0	0
SCL-1-2t	0.509	1.388	90.5213	8.53081	0.947867	0	0
T-1-5	1.262	1.412	63.2035	29.2208	7.35931	0.21645	0
T-1-4	0.407	1.029	88.8889	1.5873	9.52381	0	0
T-1-3	0.888	1.445	83.2936	16.7064	0	0	0
T-1-2	0	1.243	100	0	0	0	0
T-2-4	0.741	1.26	77.5862	20.6897	1.72414	0	0
T-3-4	0.761	0.887	73.0769	5.76923	21.1538	0	0
T-3-3	0.301	1.288	90.625	9.375	0	0	0
T-3-2	1.224	1.118	84.4059	13.1188	2.47525	0	0
T-3-1	0.188	1.081	100	0	0	0	0
T-4-7	0.093	1.052	94.8276	0	5.17241	0	0
ED3-1-8	0.712	1.545	81.0345	13.7931	5.17241	0	0
PF-1-3	1.319	1.281	57.6923	7.69231	19.2308	11.5385	3.84615
PF-1-2	2.267	2.273	0	73.0627	0	24.3542	2.58303
PF-2-5t	2.232	1.749	0.952381	71.4286	11.9048	12.8571	2.85714
PF-2-4b	2.767	1.235	0	30	30	16	24
PF-2-3	2.581	1.701	1.18243	40.3716	12.5	34.2905	11.6554
PF-2-2	2.612	2.256	0	44.6667	10	36.6667	8.66667
PF-2-1	2.048	1.949	5.64854	65.8996	0.209205	24.6862	3.55649
PF-3-2b	2.84	2.5	0	35.1145	0.763359	51.9084	12.2137
PF-3-1	2.441	2.566	0.900901	54.0541	0	44.1441	0.900901
V-1-2t	0.951	1.437	61.9565	38.0435	0	0	0
V-1-1b	0.644	1.192	91.7808	8.21918	0	0	0
V-2-7t	2.673	2.587	0	92.1569	0	0	7.84314
WR-1-11b	2.861	0.672	6.59341	5.86081	24.9084	4.7619	57.8755
WR-1-9	2.881	0.753	0	8.84956	47.3451	12.3894	31.4159
WR-1-4	0.575	1.05	73.6842	5.26316	21.0526	0	0
WR-1-3	2.612	0.836	0.543478	16.8478	69.0217	1.63043	11.9565
WR-2-6t	2.705	0.848	8.42105	11.0526	37.8947	7.89474	34.7368
WR-2-3t	2.786	0.676	9.74576	9.32203	35.5932	3.81356	41.5254
WR-3-11t	3.087	0.581	3.93013	6.9869	23.1441	3.05677	62.8821
WR-3-3t	3.083	0.932	0	20.3209	17.1123	12.2995	50.2674

## Sheet: Chemical alteration CRBP
Chemical Index of alteration CIA-K = 100 x Al/(Al+Ca+Na), see Sheldon & Tabor, 2009, for details.
	Al2O3	mAl2O3	CaO	mCaO	Na2O	mNa2O	K2O	mK2O		MgO	mMgO	SiO2	mSiO2	CIA-K	TiO	mTi	mAl		Ti/Al	MgO	mMgO	FeO	mFeO	K/(Fe+Mg)
Rattlesnake Ridge Member									Rattlesnake Ridge Member									Rattlesnake Ridge Member
WJ-1-4	14.3516	0.140757	3.71378	0.0662229	2.02994	0.0327515	0.93122	0.00988556	WJ-1-4	1.99992	0.0496012	52.883	0.880063	58.7144	1.622	0.0203004	0.140757	WJ-1-4	0.144223	1.99992	0.0496012	10.9784	0.196587	0.0401545
SRD-1-3	19.3557	0.189836	1.29673	0.0231229	1.04247	0.0168195	2.36492	0.0251053	SRD-1-3	1.60533	0.0398147	55.8529	0.929487	82.617	0.72186	0.00903454	0.189836	SRD-1-3	0.0475913	1.60533	0.0398147	4.64621	0.0831983	0.204087
RL-1-7	13.9832	0.137144	1.96917	0.0351136	1.49952	0.0241936	1.94577	0.0206557	RL-1-7	1.10037	0.0272909	65.2659	1.08614	69.8108	1.04147	0.0130347	0.137144	RL-1-7	0.0950435	1.10037	0.0272909	4.26781	0.0764224	0.199162
RL-1-4	14.1612	0.13889	2.50648	0.0446947	1.50821	0.0243338	1.07474	0.0114091	RL-1-4	1.29771	0.0321853	62.8716	1.04629	66.8002	1.71835	0.0215063	0.13889	RL-1-4	0.154844	1.29771	0.0321853	5.23251	0.093697	0.0906333
P-1-6t	20.1769	0.19789	0.916584	0.0163442	1.32943	0.0214493	2.06575	0.0219294	P-1-6t	0.864646	0.0214446	60.3127	1.00371	83.9643	0.985114	0.0123293	0.194966	P-1-6t	0.0632385	0.864646	0.0214446	3.57479	0.0640126	0.256613
P-1-5t	19.8787	0.194966	0.939333	0.0167499	0.580664	0.00936858	1.2096	0.0128408	P-1-5t	1.06503	0.0264145	56.5097	0.940417	88.1862	0.891824	0.0111618	0.187824	P-1-5t	0.0594267	1.06503	0.0264145	4.45179	0.0797168	0.120989
P-1-4b	19.1505	0.187824	0.947075	0.0168879	0.700959	0.0113094	1.32908	0.0141091	P-1-4b	1.08305	0.0268613	56.913	0.947129	86.947	0.931042	0.0116526	0.190031	P-1-4b	0.0613193	1.08305	0.0268613	4.52631	0.0810513	0.130746
P-1-2	19.3756	0.190031	1.25619	0.0224	0.654721	0.0105634	0.992815	0.0105394	P-1-2	1.55458	0.0385561	49.8368	0.829369	85.2178	0.68405	0.00856133	0.143601	P-1-2	0.0596188	1.55458	0.0385561	5.28867	0.0947026	0.0790901
MB-1-12	14.6416	0.143601	1.60906	0.0286922	1.02309	0.0165068	1.39843	0.0148453	MB-1-12	1.0883	0.0269916	71.8472	1.19566	76.0599	0.68405	0.00856133	0.143601	MB-1-12	0.0596188	1.0883	0.0269916	4.45602	0.0797926	0.139022
MB-1-11t	17.0128	0.166857	1.74911	0.0311896	1.01784	0.0164221	1.72317	0.0182927	MB-1-11t	2.02296	0.0501727	66.8504	1.11251	77.8002	0.556	0.0069587	0.166857	MB-1-11t	0.0417045	2.02296	0.0501727	5.16069	0.092411	0.128294
MB-1-10m	18.3143	0.179622	1.65333	0.0294816	0.89169	0.0143867	1.4681	0.0155849	MB-1-10m	2.38762	0.0592167	65.0412	1.0824	80.3713	0.59676	0.00746884	0.179622	MB-1-10m	0.0415807	2.38762	0.0592167	5.55917	0.0995464	0.0981646
MB-1-9b	17.8785	0.175348	1.54373	0.0275273	1.08644	0.0175289	1.63874	0.0173964	MB-1-9b	1.91234	0.047429	66.0287	1.09883	79.5575	0.50485	0.00631852	0.175348	MB-1-9b	0.0360342	1.91234	0.047429	5.41622	0.0969867	0.120461
MB-1-6t	14.1758	0.139033	1.13917	0.0203133	1.75656	0.0283408	3.53809	0.0375593	MB-1-6t	1.06795	0.026487	71.9545	1.19745	74.077	0.37786	0.00472916	0.139033	MB-1-6t	0.0340147	1.06795	0.026487	3.02535	0.0541741	0.465644
MB-1-5b	13.8912	0.136242	0.97345	0.0173582	2.0192	0.0325783	4.06714	0.0431756	MB-1-5b	0.669704	0.0166097	73.2449	1.21892	73.1781	0.39739	0.00497359	0.136242	MB-1-5b	0.0365056	0.669704	0.0166097	2.41735	0.0432868	0.720836
MB-1-4t	18.1958	0.17846	1.77842	0.0317122	1.19894	0.019344	1.75761	0.0186583	MB-1-4t	2.45645	0.0609239	65.5641	1.0911	77.7549	0.63088	0.00789587	0.17846	MB-1-4t	0.0442445	2.45645	0.0609239	4.17068	0.0746831	0.137591
MB-1-3b	16.0415	0.157332	2.36616	0.0421926	1.3009	0.020989	1.803	0.0191401	MB-1-3b	2.7282	0.0676636	67.0313	1.11552	71.3479	0.48039	0.00601239	0.157332	MB-1-3b	0.0382147	2.7282	0.0676636	4.1083	0.0735661	0.135525
MB-1-2	17.7375	0.173966	1.56544	0.0279144	1.21688	0.0196334	2.00018	0.0212333	MB-1-2	2.47992	0.061506	67.3957	1.12158	78.535	0.64715	0.0080995	0.173966	MB-1-2	0.046558	2.47992	0.061506	3.39504	0.060794	0.173617
MB-1-1	16.8648	0.165406	1.35486	0.0241594	0.65301	0.0105358	1.02172	0.0108463	MB-1-1	2.57218	0.0637943	70.5163	1.17351	82.6611	0.61907	0.00774806	0.165406	MB-1-1	0.0468428	2.57218	0.0637943	2.97479	0.0532687	0.0926534
M-1-19t	14.7589	0.144752	1.57657	0.0281129	1.54278	0.0248916	2.19461	0.0232973	M-1-19t	1.73896	0.0431289	70.8998	1.17989	73.1971	0.5541	0.00693492	0.144752	M-1-19t	0.0479089	1.73896	0.0431289	3.89278	0.0697069	0.206471
M-1-18b	16.15	0.158395	1.36757	0.0243861	1.29867	0.020953	2.23217	0.0236961	M-1-18b	1.57916	0.0391656	68.5919	1.14149	77.746	0.50319	0.00629775	0.158395	M-1-18b	0.0397596	1.57916	0.0391656	4.73973	0.084873	0.191038
M-1-10t	15.6165	0.153163	3.38153	0.0602983	1.56429	0.0252386	1.59765	0.0169602	M-1-10t	2.07653	0.0515012	66.7524	1.11087	64.1654	1.24523	0.0155849	0.153163	M-1-10t	0.101754	2.07653	0.0515012	4.46471	0.0799482	0.129024
M-1-9b	15.0956	0.148054	2.12817	0.0379488	1.8038	0.0291029	2.248	0.0238641	M-1-9b	1.99615	0.0495076	66.7876	1.11146	68.8285	2.08988	0.0261562	0.148054	M-1-9b	0.176667	1.99615	0.0495076	5.39487	0.0966044	0.163328
M-1-5	15.512	0.152138	2.1194	0.0377924	1.69653	0.0273722	2.14328	0.0227524	M-1-5	2.39596	0.0594237	67.1442	1.11739	70.0121	0.8201	0.0102641	0.152138	M-1-5	0.0674655	2.39596	0.0594237	4.74162	0.0849068	0.157641
M-1-4t	14.8869	0.146007	2.00931	0.0358294	1.6869	0.0272168	2.14124	0.0227308	M-1-4t	2.55988	0.0634891	68.1559	1.13423	69.842	0.84541	0.0105809	0.146007	M-1-4t	0.0724682	2.55988	0.0634891	4.30683	0.0771211	0.161658
M-1-3m	14.1529	0.138808	2.02977	0.0361942	1.68632	0.0272075	1.96285	0.020837	M-1-3m	2.66148	0.066009	68.8705	1.14612	68.6456	0.90357	0.0113088	0.138808	M-1-3m	0.0814703	2.66148	0.066009	4.72743	0.0846527	0.138304
M-1-2b	12.4646	0.122249	3.5536	0.0633666	2.44944	0.0395198	2.28619	0.0242695	M-1-2b	1.72246	0.0427198	70.7791	1.17788	54.3003	1.12797	0.0141173	0.122249	M-1-2b	0.115479	1.72246	0.0427198	3.21772	0.0576188	0.241876
BJ-1-8t	14.7106	0.144278	1.54822	0.0276073	0.70763	0.0114171	1.12461	0.0119385	BJ-1-8t	2.29561	0.0569348	54.5434	0.907696	78.7104	1.35417	0.0169483	0.144278	BJ-1-8t	0.11747	2.29561	0.0569348	4.69677	0.0841037	0.0846474
BJ-1-7b	15.2335	0.149407	2.10441	0.0375251	1.59393	0.0257168	1.72088	0.0182684	BJ-1-7b	1.419	0.0351935	60.2882	1.0033	70.2599	1.32379	0.0165681	0.149407	BJ-1-7b	0.110892	1.419	0.0351935	5.29288	0.094778	0.140557
BJ-1-5t	16.6687	0.163483	3.5485	0.0632757	1.85526	0.0299332	0.77242	0.00819979	BJ-1-5t	2.14941	0.0533088	55.8983	0.930242	63.6884	0.56366	0.00705457	0.163483	BJ-1-5t	0.0431518	2.14941	0.0533088	4.34089	0.077731	0.0625748
BJ-1-4t	13.1381	0.128856	2.4195	0.0431437	1.48871	0.0240192	0.93289	0.00990329	BJ-1-4t	1.41258	0.0350342	54.4408	0.905988	65.7365	4.72084	0.0590844	0.128856	BJ-1-4t	0.458531	1.41258	0.0350342	9.12081	0.163324	0.0499264
BJ-1-3	14.3878	0.141112	2.28069	0.0406685	2.01303	0.0324787	1.79061	0.0190086	BJ-1-3	0.97456	0.0241706	64.3667	1.07117	65.8605	1.57171	0.019671	0.141112	BJ-1-3	0.139399	0.97456	0.0241706	4.1633	0.074551	0.192547
BJ-1-1a	15.0619	0.147724	9.52784	0.169897	2.30458	0.0371826	0.24299	0.00257951	BJ-1-1a	4.55144	0.112883	49.6997	0.827088	41.6354	1.67328	0.0209422	0.147724	BJ-1-1a	0.141766	4.55144	0.112883	10.3437	0.185221	0.00865306
AD-1-5t	12.7679	0.125224	1.50061	0.0267584	1.43669	0.0231799	1.75024	0.01858	AD-1-5t	0.79018	0.0195977	74.527	1.24026	71.4904	0.71951	0.00900513	0.125224	AD-1-5t	0.0719119	0.79018	0.0195977	2.72224	0.0487464	0.27186
AD-1-2	15.5745	0.152751	1.05978	0.0188976	1.38362	0.0223237	2.91926	0.03099	AD-1-2	1.14403	0.0283738	67.3907	1.1215	78.7489	0.68256	0.00854268	0.152751	AD-1-2	0.0559253	1.14403	0.0283738	4.3733	0.0783114	0.290481
AD-1-1	16.4127	0.160972	1.83226	0.0326723	1.36962	0.0220978	1.21057	0.0128511	AD-1-1	2.15882	0.0535422	63.0468	1.04921	74.6131	2.23418	0.0279622	0.160972	AD-1-1	0.173709	2.15882	0.0535422	7.10917	0.127302	0.0710616
Squaw Creek-Quincy Member									Squaw Creek-Quincy Member									Squaw Creek-Quincy Member
S-1-3	17.3376	0.170043	2.42922	0.043317	0.50322	0.00811907	0.26265	0.00278822	S-1-3	3.94465	0.0978336	52.1317	0.867561	76.7761	0.69592	0.00870989	0.170043	S-1-3	0.0512217	3.94465	0.0978336	4.80788	0.0860933	0.0151594
S-1-2	19.4882	0.191136	1.99837	0.0356343	0.62048	0.010011	0.34777	0.00369183	S-1-2	2.86036	0.0709415	53.3563	0.887939	80.7226	0.93731	0.011731	0.191136	S-1-2	0.0613754	2.86036	0.0709415	5.0087	0.0896893	0.0229833
U-2-1	14.6004	0.143197	9.19473	0.163957	2.77316	0.0447428	1.34296	0.0142565	U-2-1	3.80881	0.0944645	51.299	0.853703	40.6929	3.12524	0.0391144	0.143197	U-2-1	0.27315	3.80881	0.0944645	12.8096	0.229378	0.0440229
T-4-5t	5.85018	0.0573772	1.15264	0.0205535	0.0458919	0.000740431	0.052309	0.000555297	T-4-5t	1.14911	0.0284996	70.7168	1.17685	72.933	0.31364	0.00392541	0.0573772	T-4-5t	0.0684141	1.14911	0.0284996	17.3638	0.310928	0.00163598
T-4-4b	17.3427	0.170093	3.51852	0.062741	0.905212	0.0146049	0.105489	0.00111984	T-4-4b	2.83945	0.0704228	59.5427	0.990892	68.7414	0.57811	0.00723542	0.170093	T-4-4b	0.0425381	2.83945	0.0704228	12.8255	0.229662	0.00373176
T-4-3b	17.2859	0.169536	4.70832	0.0839573	1.55644	0.0251119	0.172408	0.00183024	T-4-3b	2.35731	0.0584652	58.4005	0.971883	60.8517	0.65745	0.00822841	0.169536	T-4-3b	0.0485348	2.35731	0.0584652	13.1661	0.235762	0.00622048
T-4-2	20.5231	0.201286	2.34206	0.0417629	0.369828	0.00596689	0.769779	0.00817175	T-4-2	2.59403	0.064336	58.6245	0.975612	80.8326	2.45654	0.0307452	0.201286	T-4-2	0.152744	2.59403	0.064336	9.73855	0.174385	0.0342313
T-4-1	21.5478	0.211336	7.11707	0.126909	2.93757	0.0473955	0.363538	0.00385922	T-4-1	1.73543	0.0430415	54.5072	0.907093	54.8013	4.52577	0.0566429	0.211336	T-4-1	0.268023	1.73543	0.0430415	4.29025	0.0768242	0.0321962
T-2-7	7.22888	0.0708992	2.28004	0.040657	0.027936	0.000450726	0.0168547	0.000178925	T-2-7	1.40865	0.0349367	60.704	1.01022	63.299	0.41916	0.00524606	0.0708992	T-2-7	0.0739932	1.40865	0.0349367	23.7823	0.425862	0.000388293
T-2-5t	12.8657	0.126184	2.16938	0.0386837	0.0288384	0.000465285	0.0318009	0.000337589	T-2-5t	1.81328	0.0449721	62.2631	1.03616	76.3212	0.74231	0.00929049	0.126184	T-2-5t	0.0736264	1.81328	0.0449721	17.2292	0.308517	0.000955019
T-2-4b	21.38	0.20969	3.27815	0.0584548	0.733084	0.0118278	0.0956932	0.00101585	T-2-4b	2.55284	0.0633145	60.2354	1.00242	74.8966	0.67093	0.00839712	0.20969	T-2-4b	0.0400454	2.55284	0.0633145	9.21896	0.165081	0.00444777
T-2-1	26.8048	0.262895	1.46552	0.0261327	0.538834	0.00869367	1.58666	0.0168436	T-2-1	1.83937	0.0456193	60.6919	1.01002	88.3024	0.98	0.0122653	0.262895	T-2-1	0.0466548	1.83937	0.0456193	4.99674	0.0894752	0.12468
T-1-5	7.74218	0.0759335	2.60886	0.0465204	0.230634	0.00372111	0.189467	0.00201133	T-1-5	2.04788	0.0507906	54.8943	0.913535	60.1811	0.40473	0.00506546	0.0759335	T-1-5	0.0667091	2.04788	0.0507906	27.083	0.484968	0.00375417
T-1-4	12.5946	0.123524	3.10415	0.0553521	0.413989	0.0066794	0.212641	0.00225733	T-1-4	2.44312	0.0605933	58.9279	0.980661	66.5699	0.55467	0.00694205	0.123524	T-1-4	0.0561998	2.44312	0.0605933	17.8323	0.319317	0.00594176
T-1-3	13.9423	0.136743	3.51442	0.0626679	0.488464	0.00788099	0.107796	0.00114433	T-1-3	2.19675	0.054483	59.1942	0.985092	65.9663	0.65294	0.00817196	0.136743	T-1-3	0.0597616	2.19675	0.054483	16.9332	0.303217	0.00319912
SCL-1-6	14.5423	0.142628	1.64471	0.0293279	0.289835	0.00467626	0.0859265	0.00091217	SCL-1-6	3.57174	0.0885849	63.9191	1.06372	80.7486	0.55304	0.00692165	0.142628	SCL-1-6	0.0485296	3.57174	0.0885849	13.101	0.234596	0.00282247
SCL-1-4	8.66539	0.0849882	1.44541	0.025774	0.31482	0.00507938	0.0564028	0.000598756	SCL-1-4	1.91616	0.0475239	74.2799	1.23614	73.3659	0.38413	0.00480763	0.0849882	SCL-1-4	0.0565683	1.91616	0.0475239	11.0689	0.198208	0.00243662
SCL-1-2	11.7392	0.115135	1.33975	0.0238899	0.0904217	0.00145889	0.0681209	0.000723151	SCL-1-2	2.67204	0.0662709	91.8889	1.52919	81.9561	0.49115	0.00614706	0.115135	SCL-1-2	0.05339	2.67204	0.0662709	14.5237	0.260071	0.00221593
	Al2O3	mAl2O3	CaO	mCaO	Na2O	mNa2O	K2O	mK2O		MgO	mMgO	SiO2	mSiO2	CIA-K	TiO	mTi	mAl		Ti/Al	MgO	mMgO	FeO	mFeO	K/(Fe+Mg)
OVH-3-2	10.9461	0.107357	2.53436	0.0451919	1.12432	0.01814	0.32848	0.00348705	OVH-3-2	2.74725	0.0681362	49.4526	0.822976	62.8962	0.80321	0.0100527	0.107357	OVH-3-2	0.0936383	2.74725	0.0681362	13.1786	0.235985	0.011466
OVH-2-2	12.8702	0.126228	3.38914	0.060434	0.62467	0.0100786	0.2947	0.00312845	OVH-2-2	3.82397	0.0948405	50.201	0.83543	64.1596	0.84819	0.0106156	12.8702	OVH-2-2	0.000824824	3.82397	0.0948405	6.14041	0.109955	0.015276
OVH-1-3	8.88102	0.087103	2.20557	0.039329	0.49893	0.00804985	0.28359	0.00301051	OVH-1-3	3.13725	0.0778088	47.6824	0.793517	64.7693	0.54641	0.00683867	0.087103	OVH-1-3	0.0785125	3.13725	0.0778088	15.124	0.27082	0.00863528
HR-1-5	17.6818	0.173419	1.06931	0.0190676	0.85736	0.0138328	2.53333	0.0268931	HR-1-5	1.6636	0.0412599	58.0024	0.965259	84.0536	0.7677	0.00960826	17.6818	HR-1-5	0.000543399	1.6636	0.0412599	3.96348	0.0709729	0.239619
Vantage									Vantage									Vantage
W-4-1	19.9988	0.196144	5.23641	0.093374	1.45641	0.0234981	0.304512	0.00323262	W-4-1	3.06	0.0758928	52.954	0.881244	62.6626	1.88707	0.0236179	0.196144	W-4-1	0.120411	3.06	0.0758928	12.2059	0.218567	0.0109781
W-3-1	19.8721	0.194901	3.3337	0.0594455	0.606337	0.00978278	0.476036	0.00505347	W-3-1	2.90887	0.0721445	58.5668	0.974652	73.79	1.37312	0.0171855	0.194901	W-3-1	0.0881755	2.90887	0.0721445	9.91488	0.177543	0.0202392
W-1-3	23.07	0.226265	4.19915	0.0748779	1.01569	0.0163873	0.30056	0.00319065	W-1-3	2.82078	0.0699599	49.6046	0.825505	71.2578	1.96279	0.0245656	0.226265	W-1-3	0.10857	2.82078	0.0699599	13.8657	0.248288	0.0100257
W-1-2	25.3582	0.248708	3.21662	0.0573576	0.838951	0.0135358	0.229701	0.00243844	W-1-2	1.9839	0.0492038	50.0758	0.833346	77.8181	2.13705	0.0267466	0.248708	W-1-2	0.107542	1.9839	0.0492038	13.2798	0.237797	0.00849628
V-2-7t	17.919	0.175745	1.87916	0.0335086	1.4276	0.0230332	1.31369	0.0139458	V-2-7t	1.93325	0.0479477	57.5249	0.957313	75.6586	0.80945	0.0101308	0.175745	V-2-7t	0.0576448	1.93325	0.0479477	5.85883	0.104912	0.0912322
V-2-6m	18.3713	0.180181	1.59466	0.0284354	1.20576	0.019454	1.35519	0.0143863	V-2-6m	2.04005	0.0505965	57.0116	0.94877	79.0023	0.78245	0.00979287	0.180181	V-2-6m	0.0543501	2.04005	0.0505965	6.22962	0.111552	0.0887231
V-2-5b	16.8556	0.165316	2.29012	0.0408367	1.72315	0.0278017	1.2852	0.0136433	V-2-5b	2.05789	0.0510389	59.8971	0.996789	70.6617	0.79722	0.00997772	0.165316	V-2-5b	0.0603554	2.05789	0.0510389	5.49462	0.0983905	0.0913027
V-2-4t	19.2571	0.188869	5.06317	0.0902848	2.72328	0.043938	0.76432	0.0081138	V-2-4t	1.79405	0.0444953	56.3394	0.937584	58.4567	0.76741	0.00960463	0.188869	V-2-4t	0.0508535	1.79405	0.0444953	4.73758	0.0848345	0.0627373
V-2-3m	19.1504	0.187822	5.61278	0.100085	2.88595	0.0465626	0.77305	0.00820648	V-2-3m	2.00061	0.0496183	56.8387	0.945892	56.1552	0.75619	0.00946421	0.187822	V-2-3m	0.0503892	2.00061	0.0496183	5.32779	0.0954032	0.056588
V-2-2b	17.1853	0.168549	5.4411	0.0970239	2.71544	0.0438116	0.80085	0.00850159	V-2-2b	2.67435	0.0663281	56.103	0.93365	54.4788	1.03098	0.0129034	0.168549	V-2-2b	0.0765556	2.67435	0.0663281	7.41684	0.132811	0.0426917
V-2-1	18.538	0.181817	6.23614	0.111201	2.93216	0.0473082	0.71142	0.00755223	V-2-1	2.30654	0.0572059	55.3702	0.921454	53.4243	0.71582	0.00895895	0.181817	V-2-1	0.0492746	2.30654	0.0572059	6.24584	0.111842	0.044675
U-1-3	14.7206	0.144376	0.91971	0.0164	1.14406	0.0184585	2.44961	0.0260044	U-1-3	2.23049	0.0553197	63.4802	1.05642	80.5514	0.73628	0.00921502	0.144376	U-1-3	0.0638266	2.23049	0.0553197	5.00842	0.0896843	0.179335
U-1-2	13.8011	0.135358	0.96722	0.0172471	1.60182	0.0258441	2.63425	0.0279644	U-1-2	1.22997	0.0305052	69.9322	1.16379	75.8524	0.70549	0.00882966	0.135358	U-1-2	0.0652318	1.22997	0.0305052	3.1113	0.0557131	0.324344
RC-2-2	9.28407	0.091056	1.84821	0.0329567	0.4781	0.00771378	0.2794	0.00296603	RC-2-2	1.22287	0.0303291	40.4498	0.673153	69.1251	0.39662	0.00496395	0.091056	RC-2-2	0.0545154	1.22287	0.0303291	35.8958	0.642775	0.00440649
RC-2-1	20.2383	0.198493	3.37987	0.0602687	1.87114	0.0301894	0.62722	0.00665839	RC-2-1	2.19897	0.0545379	59.2793	0.986508	68.6943	0.59138	0.0074015	0.198493	RC-2-1	0.0372885	2.19897	0.0545379	4.21679	0.0755088	0.0511999
PV-1-12	25.9232	0.254249	0.50186	0.008949	0.16193	0.00261262	0.88364	0.00938047	PV-1-12	1.22139	0.0302924	50.0838	0.833479	95.6504	1.1865	0.0148498	0.254249	PV-1-12	0.0584067	1.22139	0.0302924	2.23794	0.0400741	0.133309
PV-1-10	14.9972	0.147089	1.95395	0.0348422	1.40517	0.0226713	1.67894	0.0178231	PV-1-10	2.24285	0.0556262	58.9427	0.980907	71.8901	1.73167	0.021673	0.147089	PV-1-10	0.147346	2.24285	0.0556262	6.05525	0.10843	0.108641
PV-1-8	14.8841	0.14598	0.7458	0.0132989	1.07132	0.0172849	2.21298	0.0234924	PV-1-8	1.37876	0.0341954	63.9808	1.06475	82.6783	0.80783	0.0101105	0.14598	PV-1-8	0.0692595	1.37876	0.0341954	4.84523	0.0867621	0.19422
PV-1-7	19.2413	0.188714	5.61232	0.100077	3.00936	0.0485537	1.64049	0.017415	PV-1-7	1.10636	0.0274395	50.0929	0.83363	55.941	4.73921	0.0593143	0.188714	PV-1-7	0.314307	1.10636	0.0274395	5.66861	0.101506	0.135057
PF-3-2b	14.8488	0.145634	6.3456	0.113153	2.39249	0.038601	0.529205	0.00561789	PF-3-2b	3.33181	0.0826343	67.2708	1.1195	48.9711	0.53494	0.00669512	0.145634	PF-3-2b	0.0459722	3.33181	0.0826343	4.15112	0.0743329	0.0357902
PF-3-1	16.5937	0.162747	2.41894	0.0431338	1.88205	0.0303654	0.449543	0.00477222	PF-3-1	3.26742	0.0810371	67.6663	1.12608	68.8887	1.74227	0.0218056	0.162747	PF-3-1	0.133985	3.26742	0.0810371	4.67364	0.0836895	0.0289705
PF-2-1	16.7818	0.164592	5.51311	0.0983079	2.26111	0.0364812	0.455526	0.00483573	PF-2-1	3.12197	0.0774298	65.3286	1.08718	54.9774	0.97387	0.0121886	0.164592	PF-2-1	0.0740536	3.12197	0.0774298	4.86191	0.0870608	0.0293982
PF-1-3	20.5332	0.201385	8.39002	0.149608	3.23578	0.0522068	0.534577	0.00567491	PF-1-3	4.08934	0.101422	54.6269	0.909085	49.9467	0.63557	0.00795457	0.201385	PF-1-3	0.0394993	4.08934	0.101422	7.35526	0.131708	0.0243422
PF-1-2	18.7642	0.184035	2.97823	0.0531068	1.50402	0.0242663	0.549737	0.00583585	PF-1-2	3.87712	0.0961587	61.7398	1.02746	70.4014	2.43083	0.0304234	0.184035	PF-1-2	0.165313	3.87712	0.0961587	6.02342	0.10786	0.0286045
ED3-1-8	17.4895	0.171533	2.44919	0.0436731	1.88456	0.0304059	0.87852	0.00932611	ED3-1-8	1.43178	0.0355104	55.309	0.920436	69.8389	0.61632	0.00771364	0.171533	ED3-1-8	0.0449689	1.43178	0.0355104	5.46858	0.0979243	0.0698927
ED3-1-4	13.8522	0.135859	0.8832	0.0157489	0.18864	0.00304356	1.10735	0.0117553	ED3-1-4	2.10032	0.0520913	61.179	1.01812	87.8485	0.56389	0.00705745	0.135859	ED3-1-4	0.0519468	2.10032	0.0520913	4.28933	0.0768078	0.0911978
Grande Ronde									Grande Ronde									Grande Ronde
YC-1-7b	15.2046	0.149123	0.92748	0.0165385	1.08792	0.0175528	2.5555	0.0271285	YC-1-7b	1.41728	0.0351508	66.8385	1.11231	81.3927	0.70202	0.00878623	0.149123	YC-1-7b	0.0589192	1.41728	0.0351508	3.39062	0.0607148	0.282984
YC-1-3t	13.7011	0.134377	6.78302	0.120953	3.38297	0.0545816	1.81194	0.019235	YC-1-3t	1.57582	0.0390828	63.5296	1.05724	43.3598	0.70467	0.0088194	0.134377	YC-1-3t	0.0656319	1.57582	0.0390828	4.84191	0.0867027	0.152919
WR-3-11t	21.1607	0.20754	1.49926	0.0267342	0.89497	0.0144397	2.94157	0.0312269	WR-3-11t	2.86235	0.0709908	60.6243	1.00889	83.4453	0.98346	0.0123086	0.20754	WR-3-11t	0.0593074	2.86235	0.0709908	7.1635	0.128275	0.15671
WR-3-10b	17.6499	0.173106	1.55237	0.0276813	1.33716	0.021574	2.8173	0.0299077	WR-3-10b	2.29513	0.0569228	67.3634	1.12104	77.849	0.8132	0.0101777	0.173106	WR-3-10b	0.0587948	2.29513	0.0569228	5.16672	0.0925189	0.200129
WR-3-8	15.574	0.152746	1.61876	0.0288652	1.42721	0.023027	2.59998	0.0276007	WR-3-8	1.85772	0.0460745	69.4137	1.15516	74.642	0.7322	0.00916395	0.152746	WR-3-8	0.0599948	1.85772	0.0460745	5.80281	0.103909	0.184024
WR-3-7	13.5779	0.133169	1.63294	0.029118	1.64317	0.0265112	2.59342	0.027531	WR-3-7	1.44236	0.0357729	74.5771	1.24109	70.5351	0.72944	0.00912941	0.133169	WR-3-7	0.068555	1.44236	0.0357729	3.28851	0.0588864	0.290843
WR-3-6t	15.4476	0.151506	1.60393	0.0286007	1.50462	0.0242759	2.67417	0.0283882	WR-3-6t	1.96957	0.0488484	70.5637	1.1743	74.1287	0.71855	0.00899312	0.151506	WR-3-6t	0.059358	1.96957	0.0488484	4.67278	0.0836741	0.214214
WR-3-5b	18.4923	0.181368	1.53682	0.0274041	1.32538	0.021384	3.14381	0.0333738	WR-3-5b	2.41764	0.0599613	65.8571	1.09597	78.8022	0.84635	0.0105926	0.181368	WR-3-5b	0.058404	2.41764	0.0599613	5.28843	0.0946984	0.215789
WR-2-7	19.9799	0.195958	1.2777	0.0227835	1.09964	0.0177419	3.18365	0.0337967	WR-2-7	2.7481	0.0681572	63.5495	1.05757	82.8633	0.86812	0.0108651	0.195958	WR-2-7	0.0554459	2.7481	0.0681572	6.133	0.109822	0.189892
WR-2-6t	18.8137	0.18452	1.60047	0.0285391	1.19886	0.0193426	3.10426	0.0329539	WR-2-6t	2.62937	0.0652125	64.0938	1.06663	79.397	0.87573	0.0109603	0.18452	WR-2-6t	0.059399	2.62937	0.0652125	6.39855	0.114577	0.183292
WR-2-4	18.8806	0.185176	1.65226	0.0294626	1.11297	0.0179569	2.95164	0.0313338	WR-2-4	2.86023	0.0709383	63.1354	1.05068	79.6129	0.88765	0.0111095	0.185176	WR-2-4	0.0599942	2.86023	0.0709383	7.0672	0.12655	0.158661
WR-1-14	14.5504	0.142707	9.08878	0.162068	3.13308	0.0505499	1.19462	0.0126817	WR-1-14	4.25409	0.105508	54.3483	0.904449	40.1624	1.82184	0.0228015	0.142707	WR-1-14	0.159778	4.25409	0.105508	10.8776	0.194782	0.0422315
WR-1-12t	14.7744	0.144904	0.967717	0.017256	1.6776	0.0270668	4.11151	0.0436466	WR-1-12t	1.55227	0.0384988	72.8936	1.21307	76.5769	0.5445	0.00681477	0.144904	WR-1-12t	0.0470295	1.55227	0.0384988	3.12214	0.0559072	0.462328
WR-1-11b	17.6859	0.173459	1.15343	0.0205676	1.46323	0.023608	3.2287	0.034275	WR-1-11b	2.00578	0.0497467	69.5164	1.15687	79.7019	0.76423	0.00956483	0.173459	WR-1-11b	0.0551418	2.00578	0.0497467	3.60203	0.0645005	0.300007
WR-1-10	15.2151	0.149226	1.13169	0.0201798	1.49767	0.0241637	2.90397	0.0308277	WR-1-10	1.47468	0.0365743	73.4131	1.22172	77.0917	0.69073	0.00864493	0.149226	WR-1-10	0.0579318	1.47468	0.0365743	3.30513	0.059184	0.321933
WR-1-9	17.4214	0.170865	1.14507	0.0204185	1.20613	0.01946	2.72549	0.0289331	WR-1-9	2.11423	0.0524362	68.8237	1.14534	81.0773	0.81012	0.0101392	0.170865	WR-1-9	0.0593401	2.11423	0.0524362	5.07127	0.0908097	0.201982
WR-1-8	15.1863	0.148943	2.52146	0.0449618	1.40922	0.0227367	1.88966	0.0200601	WR-1-8	2.36153	0.0585697	68.8958	1.14654	68.7509	1.32284	0.0165562	0.148943	WR-1-8	0.111158	2.36153	0.0585697	5.76009	0.103144	0.124047
WR-1-7t	20.1933	0.198051	1.08266	0.0193056	0.997489	0.0160937	2.96555	0.0314814	WR-1-7t	2.65835	0.0659313	63.2692	1.05291	84.8365	0.92192	0.0115384	0.198051	WR-1-7t	0.0582598	2.65835	0.0659313	6.45589	0.115604	0.173418
WR-1-6m	13.765	0.135004	1.63461	0.0291478	1.49538	0.0241268	2.85234	0.0302797	WR-1-6m	1.94733	0.0482968	73.2905	1.21968	71.7044	0.63851	0.00799136	0.135004	WR-1-6m	0.0591934	1.94733	0.0482968	3.66926	0.0657044	0.265608
WR-1-5b	20.1256	0.197387	1.21078	0.0215902	1.03709	0.0167326	3.26056	0.0346132	WR-1-5b	2.94093	0.0729397	63.3472	1.05421	83.7415	0.90497	0.0113263	0.197387	WR-1-5b	0.0573811	2.94093	0.0729397	5.93496	0.106276	0.193138
WR-1-4	20.5344	0.201397	1.43198	0.0255345	0.965864	0.0155835	3.21607	0.0341409	WR-1-4	3.04399	0.0754957	61.5176	1.02376	83.0452	0.91522	0.0114546	0.201397	WR-1-4	0.0568756	3.04399	0.0754957	6.92567	0.124016	0.171122
WR-1-3	16.9138	0.165887	1.63493	0.0291536	1.24564	0.0200974	2.84813	0.030235	WR-1-3	2.61873	0.0649487	67.0857	1.11642	77.1072	0.81613	0.0102144	0.165887	WR-1-3	0.0615745	2.61873	0.0649487	5.72335	0.102486	0.180577
WR-1-1	14.1801	0.139075	1.53405	0.0273547	1.53226	0.0247219	2.55159	0.0270869	WR-1-1	2.49621	0.06191	71.1886	1.1847	72.7564	0.72126	0.00902703	0.139075	WR-1-1	0.0649075	2.49621	0.06191	5.16411	0.0924722	0.175454
